# Supplementary material for: Layer-Specific Organization of Local Excitatory and Inhibitory Synaptic Connectivity in the Rat Presubiculum
Source: PubMed Central journal article supplement — Cereb Cortex. 2017 Feb 25;27(4):2435–52. doi: 10.1093/cercor/bhx049 (PMC5390487; doi:10.1093/cercor/bhx049), 2017-02-25
Supplement: rearrangedsupplementarymaterial.pdf [file rearrangedsupplementarymaterial.pdf]

## Supplement figure 1

A superficial layers

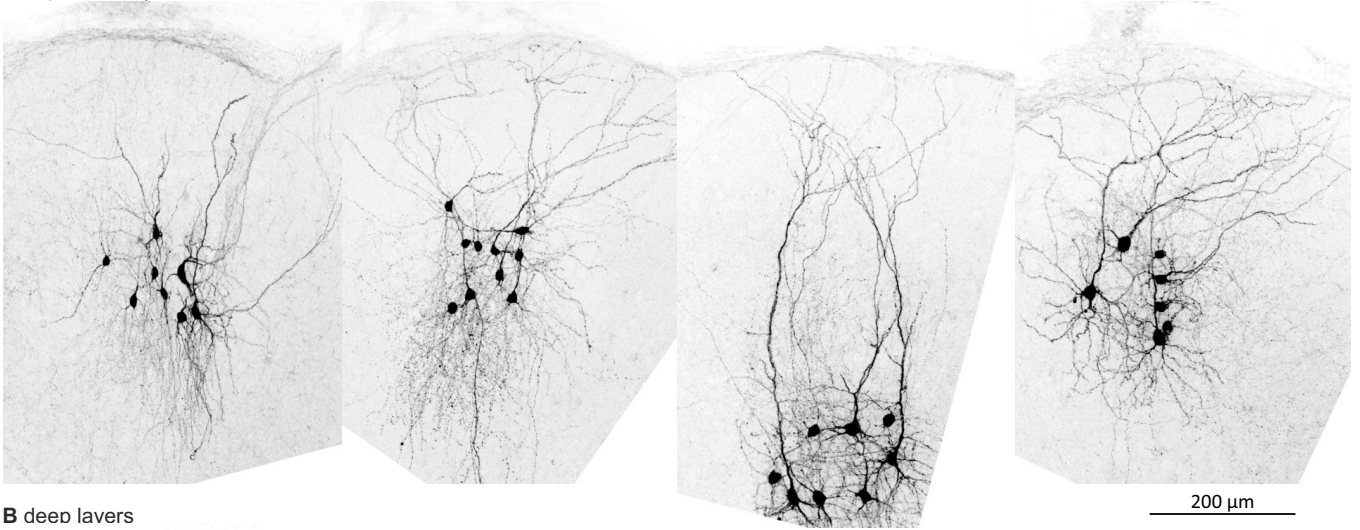

B deep layers

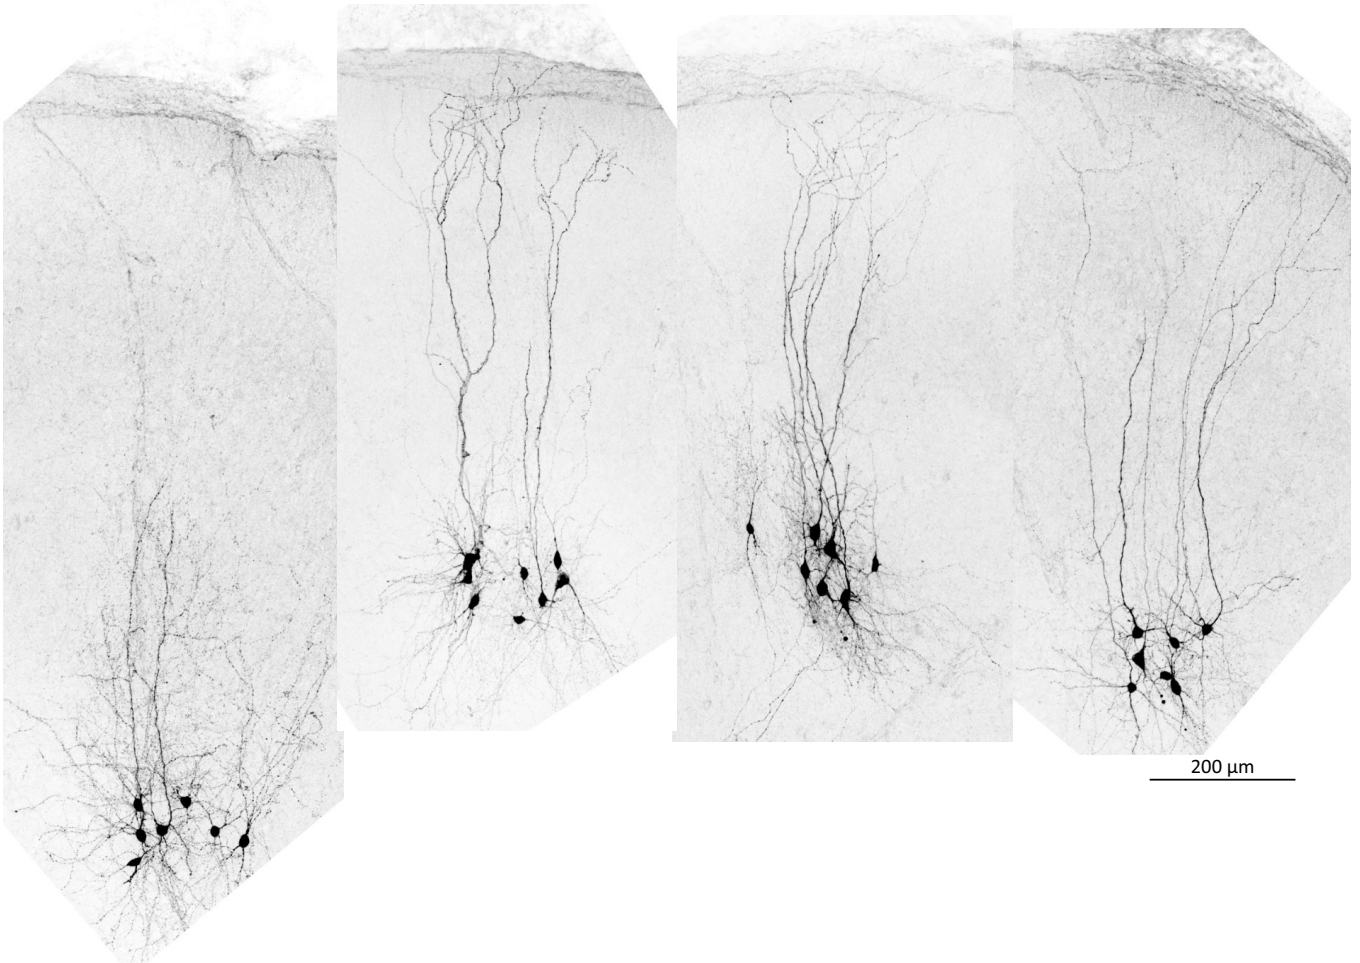

Representative images of recorded cells filled with biocytin. (A) Example of clusters from superficial layers. In a few experiments, such as in the second cluster, after recording from eight cells, individual pipettes could be retracted forming an outside-out patch and replaced while maintaining the recording configurations of the other seven cells. Additional cells could then be patched to start a new recording session with the remaining cells. (B) Examples of cell clusters in the deep layers. Note that in some cases the dendritic orientation that was used to determine the distance to the pia deviates from the perpendicular axis to the pia.

## Supplement figure 2

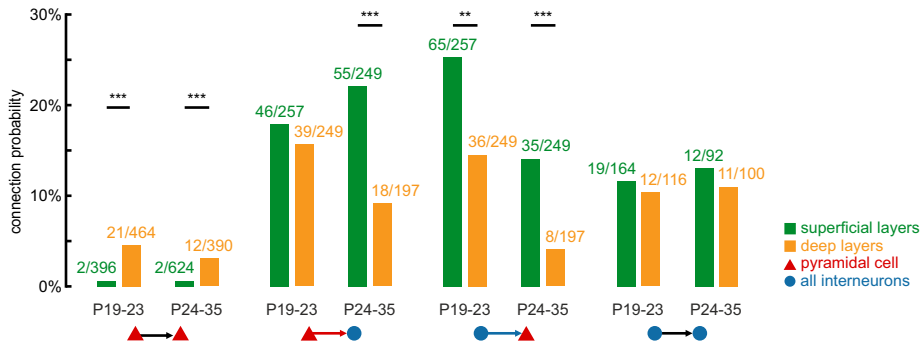

Age-dependent connection probability. Connection probability is shown for different age groups (P19-23, P24-35), layers (green: superficial, orange: deep) and synaptic groups. Fisher's exact test was used for statistical comparison. \*\*\* $p < 0.001$ , \*\* $p < 0.01$ . Significant layer-specific differences exist within both age groups and all relevant synaptic groups, except in PC-IN connections of young animals.

### Supplement figure 3

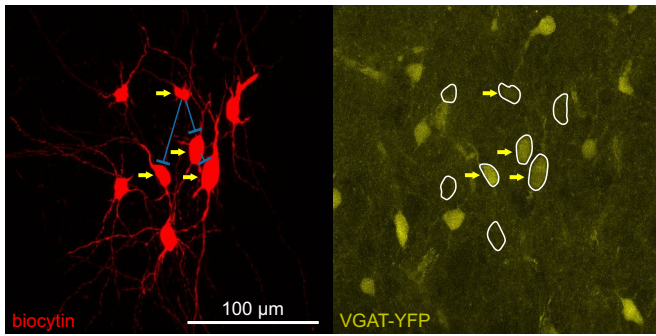

A cluster of eight cells with 4 YFP-positive cells (yellow arrows) in the deep layers filled with biocytin (red). This cluster contained, among other connections, three connections between interneurons (blue arrows). These represent three out of five observed deep IN-IN connections orientated towards deeper layers which resulted in the significant deviation in the orientation preference in this synaptic group.

## Supplement figure 4

**A** layer II, PV-positive interneuron

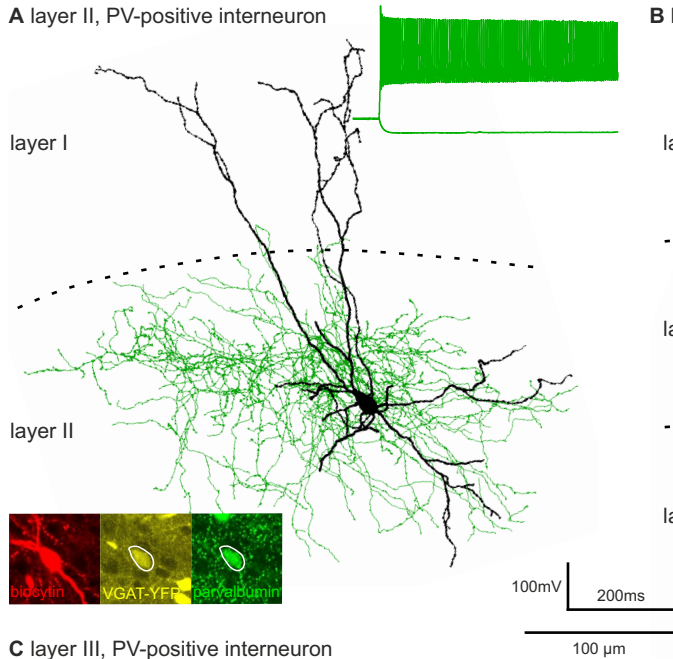

**B** layer II, PV-negative interneuron

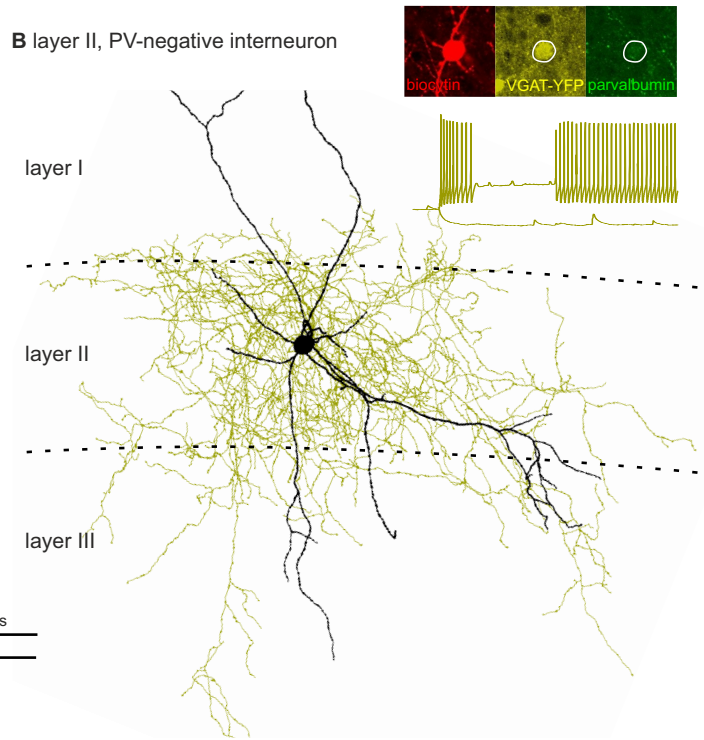

**C** layer III, PV-positive interneuron

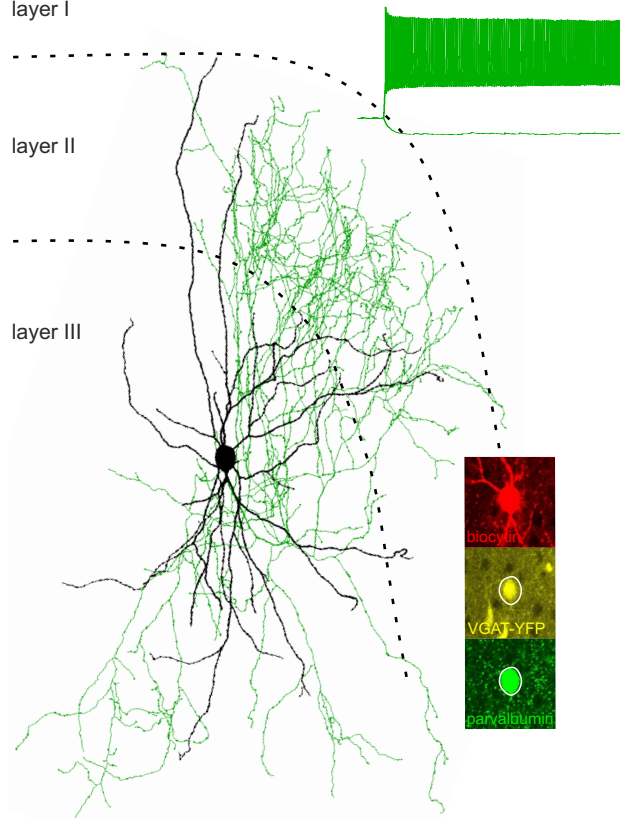

**D** layer III, PV-negative interneuron

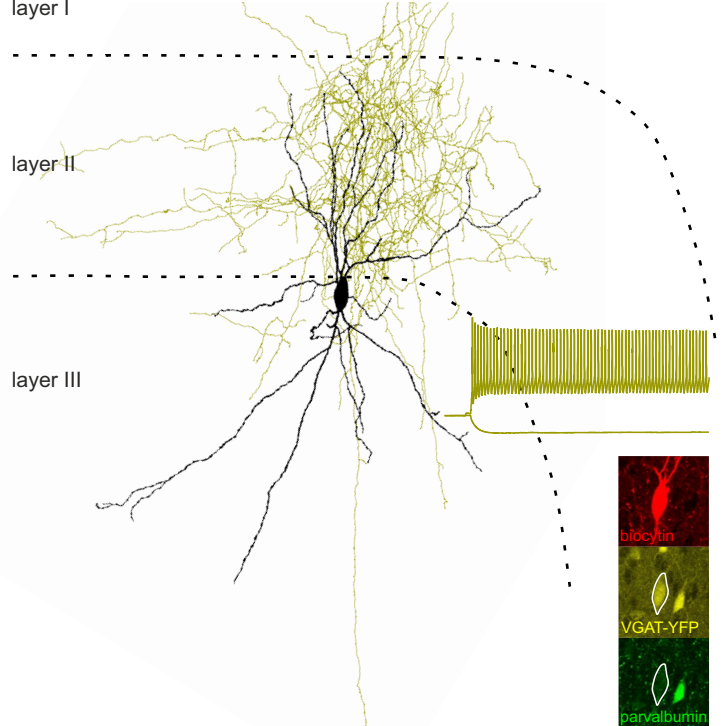

**E** Higher magnification of axonal baskets from cell (A)

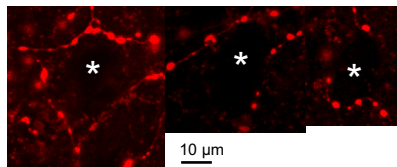

**F** Higher magnification of axonal baskets from cell (C)

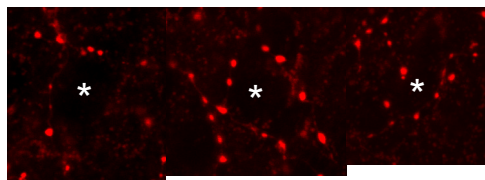

Morphological reconstructions of immunohistochemically identified interneurons. (A) Reconstruction of layer II parvalbumin-positive interneuron with axon colored in green. Fast spiking firing pattern is shown on the upper right side. Stainings in the lower left corner show the cell body positive for biocytin (red), VGAT-YFP (yellow) and PV (green). Dotted lines roughly depict layer borders. Respective scale bars apply to firing patterns, reconstructions and cell body stainings of panel A to D. (B) Reconstruction of layer II parvalbumin-negative cell with axons colored in yellow. (C) Layer III, parvalbumin-positive cell. (D) Layer III parvalbumin-negative cell. (E) Biocytin-labelled (red) presynaptic varicosities of parvalbumin-positive interneuron from panel A form axonal basket-like structures around somata of pyramidal cells (asterisk). (F) Axonal baskets of parvalbumin-positive interneuron from panel C.



## Supplement figure 5

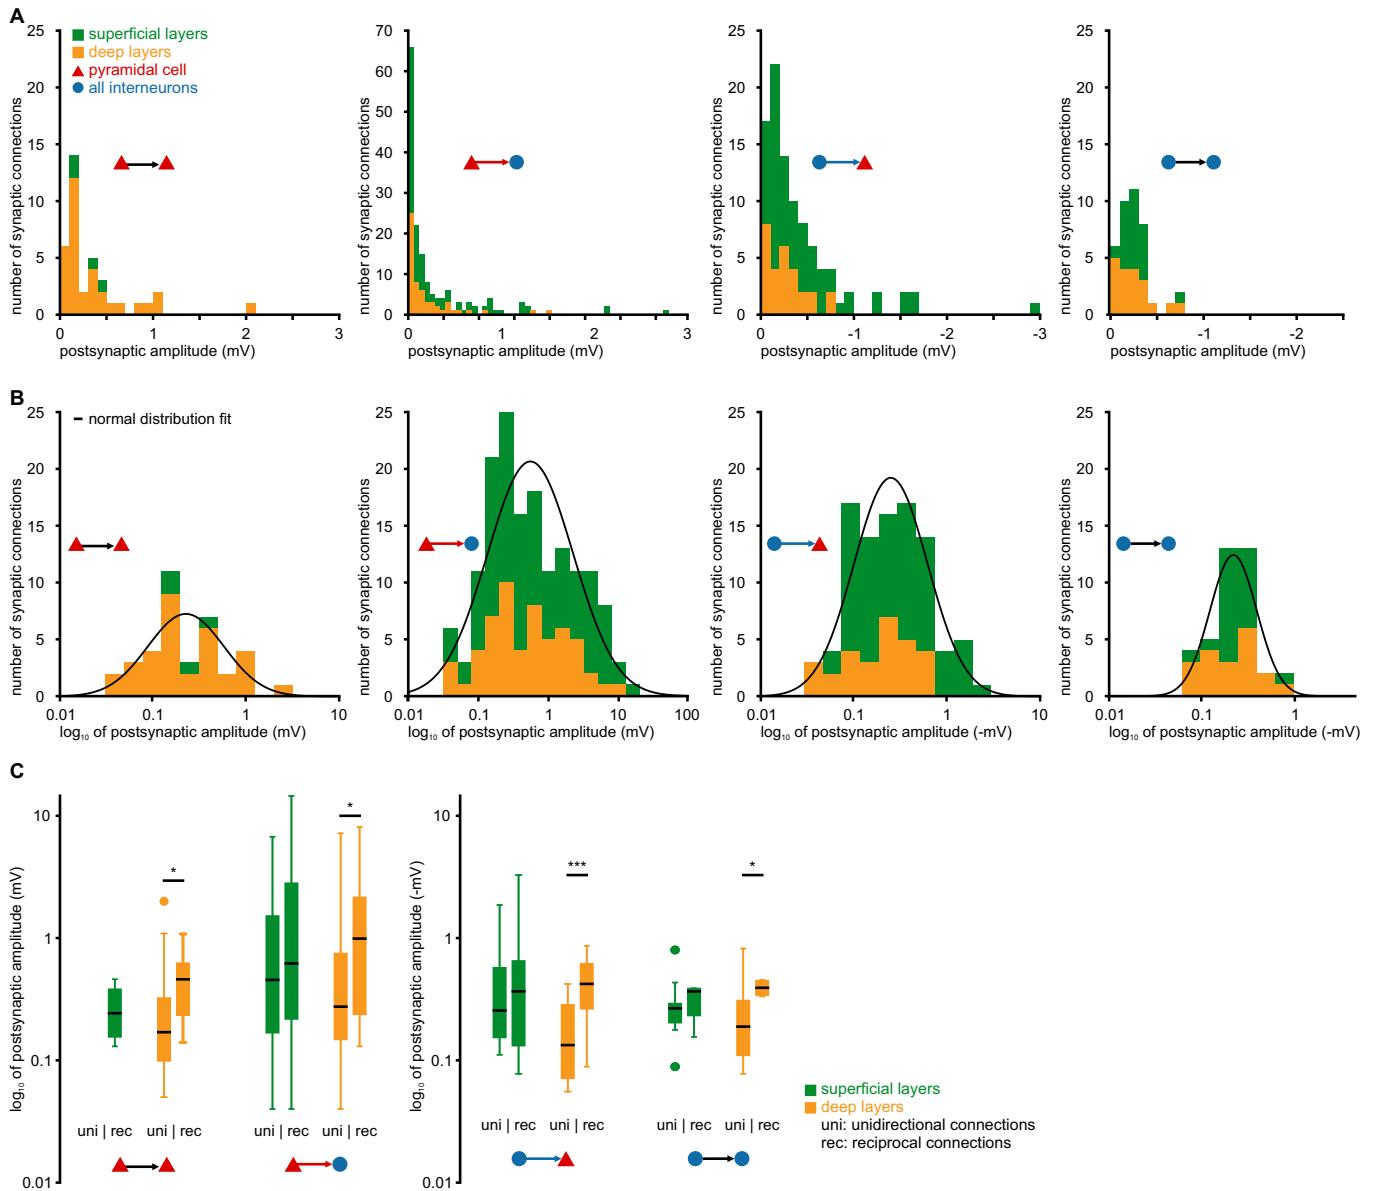

Log-normal distribution of postsynaptic amplitudes. (A) The postsynaptic amplitude distributions are shown for four synaptic groups. Each histogram furthermore distinguishes between superficial (green) and deep layers (orange). (B) The postsynaptic amplitude distributions are shown on a logarithmic scale for the amplitude. The black curve depicts a fitted normal distribution which in this case represents a log-normal distribution. (C) Box plots of postsynaptic amplitudes of unidirectional connections (uni) and reciprocal connections (rec) are shown on a logarithmic scale for each synaptic group and layer. Mann-Whitney U test was used for statistical comparison. \* $p < 0.05$ , \*\*\* $p < 0.001$ .

## Supplement figure 6

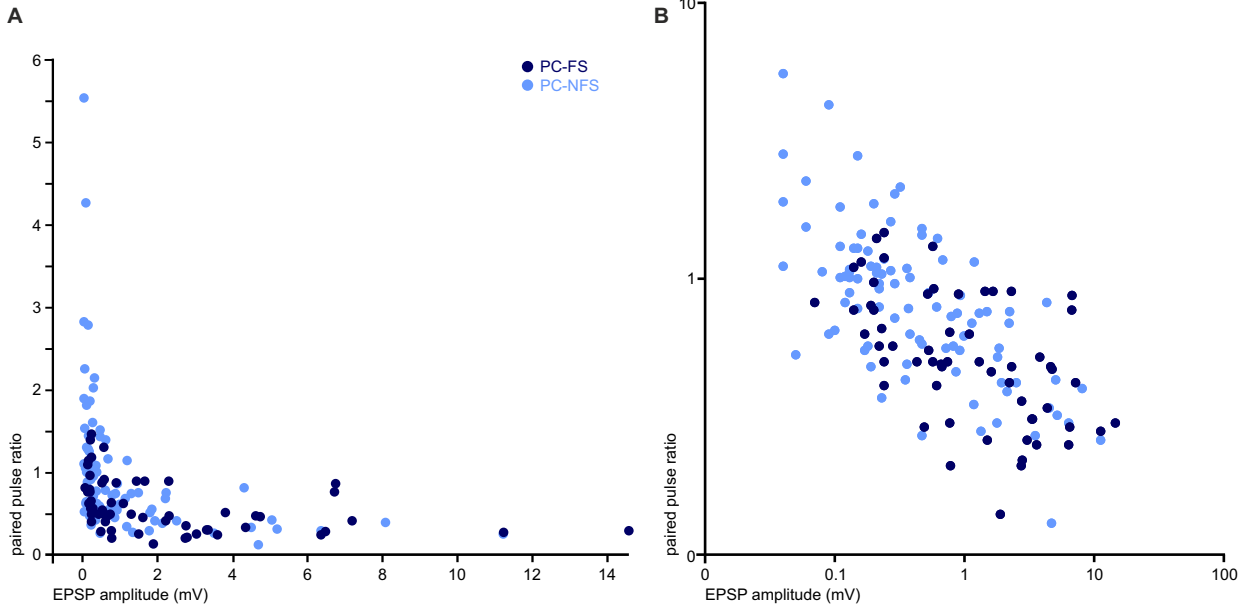

The relationship of short-term plasticity and amplitude of postsynaptic responses. A scatter diagram of the paired pulse ratio as a function of the postsynaptic amplitude for excitatory connections onto interneurons. PC-FS connections are plotted in dark blue and PC-NFS connections in light blue. (A) linear scale. (B) log<sub>10</sub> scale on both axes.

Supplement table 1

| synaptic type | region  | layer       | connection probability |                    |                        |                    |              |                       |                         |         |                       |                         | ventral vs dorsal |                       |                         | PC-FS vs PC-NFS |                       |                         | PC-PC vs PC-IN |       |       |       |
|---------------|---------|-------------|------------------------|--------------------|------------------------|--------------------|--------------|-----------------------|-------------------------|---------|-----------------------|-------------------------|-------------------|-----------------------|-------------------------|-----------------|-----------------------|-------------------------|----------------|-------|-------|-------|
|               |         |             | found connections      | tested connections | connection probability | standard deviation | p-value      | proportion difference | 95% confidence interval | p-value | proportion difference | 95% confidence interval | p-value           | proportion difference | 95% confidence interval | p-value         | proportion difference | 95% confidence interval |                |       |       |       |
| PC-PC         | ventral | superficial | 2                      | 746                | 0.3%                   | 0.2%               | <b>0.000</b> | 3.4%                  | 1.7%                    | 4.2%    | 0.293                 | 0.5%                    | -0.6%             | 1.0%                  |                         |                 |                       |                         |                |       |       |       |
| PC-PC         | ventral | deep        | 19                     | 524                | 3.6%                   | 0.8%               |              | 0.6%                  | -2.1%                   | 1.9%    | 0.716                 |                         |                   |                       |                         |                 |                       |                         |                |       |       |       |
| PC-PC         | dorsal  | superficial | 2                      | 274                | 0.7%                   | 0.5%               | <b>0.009</b> | 3.5%                  | 1.1%                    | 4.7%    |                       |                         |                   |                       |                         |                 |                       |                         |                |       |       |       |
| PC-PC         | dorsal  | deep        | 14                     | 330                | 4.2%                   | 1.1%               |              |                       |                         |         |                       |                         |                   |                       |                         |                 |                       |                         |                |       |       |       |
| PC-FS         | ventral | superficial | 23                     | 124                | 18.5%                  | 3.5%               | 0.839        | 1.9%                  | -9.8%                   | 7.6%    | <b>0.012</b>          | 21.5%                   | 3.8%              | 30.1%                 | 0.456                   | 3.3%            | -8.3%                 | 9.0%                    | 0.000          | 18.3% | 11.4% | 21.6% |
| PC-FS         | ventral | deep        | 10                     | 60                 | 16.7%                  | 4.8%               |              |                       |                         |         | 0.818                 | 1.7%                    | -10.6%            | 7.7%                  | 0.265                   | 5.7%            | -13.1%                | 14.9%                   | 0.000          | 13.0% | 3.5%  | 17.7% |
| PC-FS         | dorsal  | superficial | 14                     | 35                 | 40.0%                  | 8.3%               | <b>0.007</b> | 25.0%                 | 7.0%                    | 33.8%   |                       |                         |                   |                       | 0.136                   | 14.0%           | -4.0%                 | 22.9%                   | 0.000          | 39.3% | 23.0% | 47.2% |
| PC-FS         | dorsal  | deep        | 12                     | 80                 | 15.0%                  | 4.0%               |              |                       |                         |         |                       |                         |                   |                       | 0.823                   | 2.4%            | -6.7%                 | 6.8%                    | 0.000          | 10.8% | 2.6%  | 14.7% |
| PC-NFS        | ventral | superficial | 37                     | 243                | 15.2%                  | 2.3%               | 0.215        | 4.3%                  | -1.9%                   | 7.3%    | 0.023                 | 10.7%                   | 1.2%              | 15.4%                 |                         |                 |                       |                         | 0.000          | 15.0% | 10.4% | 17.2% |
| PC-NFS        | ventral | deep        | 24                     | 219                | 11.0%                  | 2.1%               |              |                       |                         |         | 0.693                 | 1.7%                    | -6.4%             | 5.7%                  |                         |                 |                       |                         | 0.000          | 7.3%  | 2.9%  | 9.5%  |
| PC-NFS        | dorsal  | superficial | 27                     | 104                | 26.0%                  | 4.3%               | 0.028        | 13.3%                 | 2.4%                    | 18.7%   |                       |                         |                   |                       |                         |                 |                       |                         | 0.000          | 25.2% | 16.7% | 29.4% |
| PC-NFS        | dorsal  | deep        | 11                     | 87                 | 12.6%                  | 3.6%               |              |                       |                         |         |                       |                         |                   |                       |                         |                 |                       |                         | <b>0.008</b>   | 8.4%  | 1.1%  | 12.0% |
| FS-PC         | ventral | superficial | 32                     | 124                | 25.8%                  | 3.9%               | 0.353        | 7.5%                  | -5.0%                   | 13.6%   | 0.657                 | 5.8%                    | -9.5%             | 13.3%                 | 0.073                   | 8.5%            | -3.9%                 | 14.6%                   |                |       |       |       |
| FS-PC         | ventral | deep        | 11                     | 60                 | 18.3%                  | 5.0%               |              |                       |                         |         | 0.014                 | 13.3%                   | 2.4%              | 18.7%                 | 0.111                   | 8.3%            | -8.2%                 | 16.4%                   |                |       |       |       |
| FS-PC         | dorsal  | superficial | 7                      | 35                 | 20.0%                  | 6.8%               | 0.033        | 15.0%                 | 0.9%                    | 21.9%   |                       |                         |                   |                       | 0.806                   | 1.7%            | -12.4%                | 8.6%                    |                |       |       |       |
| FS-PC         | dorsal  | deep        | 4                      | 80                 | 5.0%                   | 2.4%               |              |                       |                         |         |                       |                         |                   |                       | 0.539                   | 3.0%            | -3.7%                 | 6.3%                    |                |       |       |       |
| NFS-PC        | ventral | superficial | 42                     | 243                | 17.3%                  | 2.4%               | 0.030        | 7.2%                  | 1.0%                    | 10.3%   | 0.878                 | 1.0%                    | -7.8%             | 5.3%                  |                         |                 |                       |                         |                |       |       |       |
| NFS-PC        | ventral | deep        | 22                     | 219                | 10.0%                  | 2.0%               |              |                       |                         |         | 0.670                 | 2.0%                    | -5.0%             | 5.4%                  |                         |                 |                       |                         |                |       |       |       |
| NFS-PC        | dorsal  | superficial | 19                     | 104                | 18.3%                  | 3.8%               | 0.055        | 10.2%                 | 0.9%                    | 14.8%   |                       |                         |                   |                       |                         |                 |                       |                         |                |       |       |       |
| NFS-PC        | dorsal  | deep        | 7                      | 87                 | 8.0%                   | 2.9%               |              |                       |                         |         |                       |                         |                   |                       |                         |                 |                       |                         |                |       |       |       |

Connection probability, calculated by the number of found synaptic connections divided by the number of tested possible connections, is shown for different synaptic types, in the dorsal and ventral regions, and for the superficial and deep layers. The standard deviation is calculated by assuming a binomial distribution. Further columns show comparisons between layers, regions and cell types. P-values are calculated by the Fisher's exact test. We adjusted for multiple comparison (4 for excitatory connections, 3 for inhibitory connections) using the Bonferroni correction which determines that only p-values below 0.013 (excitatory connection) or below 0.017 (inhibitory connections) are significant at a level of  $\alpha=0.05$ , these values are highlighted in red. We calculated the proportion difference and its 95% confidence interval. To test for equivalence at a significance level of  $\alpha=0.05$  the assumed range of inconsequential difference have to lie within the 95% confidence interval of the difference. One row is always tested against its corresponding row depending on comparison. Therefore, two rows would have the same statistics, allowing us to leave one of the rows empty which are indicated with the light grey filling. Rows which are not included in certain cell-specific comparisons are marked with the dark grey filling.







Supplement table 4

| synaptic type | region  | layer       | half duration (ms) |                |                | statistics  |         |               | superficial vs deep |                                              |         | ventral vs dorsal |                   |                                              | PC-FS vs PC-NFS |               |                   | PC-PC vs IN-PC                               |         |               |                   |                                              |      |     |       |      |  |  |
|---------------|---------|-------------|--------------------|----------------|----------------|-------------|---------|---------------|---------------------|----------------------------------------------|---------|-------------------|-------------------|----------------------------------------------|-----------------|---------------|-------------------|----------------------------------------------|---------|---------------|-------------------|----------------------------------------------|------|-----|-------|------|--|--|
|               |         |             | median             | lower quartile | upper quartile | sample size | p-value | effect size r | median difference   | 95% confidence interval of median difference | p-value | effect size r     | median difference | 95% confidence interval of median difference | p-value         | effect size r | median difference | 95% confidence interval of median difference | p-value | effect size r | median difference | 95% confidence interval of median difference |      |     |       |      |  |  |
| PC-PC         | ventral | superficial | 15.6               | 10.7           | 20.5           | 2           | 0.842   | 0.06          | -0.6                | -16.1                                        | 12.7    | 1.000             | 0.39              | -4.4                                         | -13.6           | 4.8           |                   |                                              |         |               |                   |                                              |      |     |       |      |  |  |
| PC-PC         | ventral | deep        | 16.4               | 11.2           | 22.9           | 17          |         |               |                     |                                              | 0.941   | 0.02              | 0.7               | -5.5                                         | 7.5             |               |                   |                                              |         |               |                   |                                              |      |     |       |      |  |  |
| PC-PC         | dorsal  | superficial | 20.0               | 15.7           | 24.3           | 2           | 0.485   | 0.25          | 3.6                 | -13.0                                        | 15.6    |                   |                   |                                              |                 |               |                   |                                              |         |               |                   |                                              |      |     |       |      |  |  |
| PC-PC         | dorsal  | deep        | 14.5               | 12.7           | 19.2           | 10          |         |               |                     |                                              |         |                   |                   |                                              |                 |               |                   |                                              |         |               |                   |                                              |      |     |       |      |  |  |
| PC-FS         | ventral | superficial | 10.2               | 5.5            | 13.8           | 23          | 0.274   | 0.19          | 2.0                 | -1.3                                         | 5.5     | 0.039             | 0.34              | -3.6                                         | -7.1            | -0.1          | 0.077             | 0.24                                         | -2.7    | -6.2          | 0.3               | 0.240                                        | 0.26 | 5.4 | -5.7  | 16.5 |  |  |
| PC-FS         | ventral | deep        | 8.3                | 4.8            | 10.3           | 11          |         |               |                     |                                              |         | 0.104             | 0.35              | -2.4                                         | -8.3            | 0.6           | 0.032             | 0.37                                         | -4.0    | -8.7          | -0.3              | 0.001                                        | 0.58 | 9.0 | 3.0   | 14.8 |  |  |
| PC-FS         | dorsal  | superficial | 13.4               | 11.5           | 17.4           | 14          | 0.176   | 0.27          | 2.6                 | -2.1                                         | 7.2     |                   |                   |                                              |                 |               | 0.287             | 0.19                                         | -2.8    | -6.5          | 2.0               | 0.150                                        | 0.40 | 5.0 | -5.0  | 14.9 |  |  |
| PC-FS         | dorsal  | deep        | 10.9               | 5.6            | 18.1           | 12          |         |               |                     |                                              |         |                   |                   |                                              |                 |               | 0.169             | 0.31                                         | -3.5    | -10.4         | 2.4               | 0.080                                        | 0.38 | 4.4 | -0.5  | 9.4  |  |  |
| PC-NFS        | ventral | superficial | 11.5               | 8.8            | 16.5           | 33          | 0.891   | 0.02          | 0.4                 | -3.4                                         | 4.2     | 0.113             | 0.22              | -3.1                                         | -7.3            | 1.0           |                   |                                              |         |               |                   | 0.706                                        | 0.09 | 2.7 | -11.1 | 13.8 |  |  |
| PC-NFS        | ventral | deep        | 11.7               | 9.4            | 19.5           | 22          |         |               |                     |                                              |         | 0.334             | 0.18              | -3.3                                         | -8.5            | 2.9           |                   |                                              |         |               |                   | 0.163                                        | 0.27 | 3.8 | -0.9  | 9.1  |  |  |
| PC-NFS        | dorsal  | superficial | 17.2               | 11.8           | 20.5           | 19          | 0.962   | 0.01          | -0.2                | -4.5                                         | 7.0     |                   |                   |                                              |                 |               |                   |                                              |         |               |                   | 0.533                                        | 0.18 | 3.9 | -11.6 | 16.6 |  |  |
| PC-NFS        | dorsal  | deep        | 16.8               | 13.9           | 19.6           | 9           |         |               |                     |                                              |         |                   |                   |                                              |                 |               |                   |                                              |         |               |                   | 0.968                                        | 0.02 | 0.1 | -5.5  | 6.7  |  |  |
| FS-PC         | ventral | superficial | 24.0               | 20.8           | 28.5           | 18          | 0.740   | 0.09          | -1.3                | -23.7                                        | 10.6    | 0.378             | 0.18              | -2.4                                         | -11.7           | 3.5           | 0.728             | 0.06                                         | -0.7    | -3.4          | 5.4               |                                              |      |     |       |      |  |  |
| FS-PC         | ventral | deep        | 25.0               | 16.8           | 46.6           | 3           |         |               |                     |                                              |         | 1.000             | 0.22              | -16.2                                        | -24.4           | 5.4           | 0.937             | 0.05                                         | 3.3     | -18.6         | 25.2              |                                              |      |     |       |      |  |  |
| FS-PC         | dorsal  | superficial | 26.4               | 21.0           | 37.1           | 6           | 0.286   | 0.57          | -14.8               | -21.2                                        | -2.5    |                   |                   |                                              |                 |               | 0.470             | 0.17                                         | 3.7     | -2.3          | 15.6              |                                              |      |     |       |      |  |  |
| FS-PC         | dorsal  | deep        | 41.2               | 41.2           | 41.2           | 1           |         |               |                     |                                              |         |                   |                   |                                              |                 |               | 0.400             | 0.63                                         | 11.3    | 3.2           | 15.5              |                                              |      |     |       |      |  |  |
| NFS-PC        | ventral | superficial | 24.5               | 18.4           | 27.2           | 21          | 0.416   | 0.15          | -3.6                | -11.6                                        | 6.0     | 0.825             | 0.04              | 1.2                                          | -5.0            | 5.3           |                   |                                              |         |               |                   |                                              |      |     |       |      |  |  |
| NFS-PC        | ventral | deep        | 27.3               | 19.1           | 35.8           | 10          |         |               |                     |                                              |         | 0.635             | 0.15              | -3.2                                         | -19.6           | 10.1          |                   |                                              |         |               |                   |                                              |      |     |       |      |  |  |
| NFS-PC        | dorsal  | superficial | 21.5               | 20.2           | 27.5           | 15          | 0.080   | 0.41          | -8.1                | -16.5                                        | 1.3     |                   |                   |                                              |                 |               |                   |                                              |         |               |                   |                                              |      |     |       |      |  |  |
| NFS-PC        | dorsal  | deep        | 29.9               | 27.4           | 34.3           | 4           |         |               |                     |                                              |         |                   |                   |                                              |                 |               |                   |                                              |         |               |                   |                                              |      |     |       |      |  |  |

Half duration of postsynaptic potentials are shown for different synaptic types, in the dorsal and ventral regions, and for the superficial and deep layers. Given the assumption of a non-parametric distribution, the median and the first and third quartiles are depicted. Further columns show comparisons between layers, regions and cell types. P-values are calculated by the Mann-Whitney U test. We adjusted for multiple comparison (4 for excitatory connections, 3 for inhibitory connections) using the Bonferroni correction which determines that only p-values below 0.013 (excitatory connection) or below 0.017 (inhibitory connections) are significant at a level of  $\alpha=0.05$ , these values are highlighted in red. Comparisons with an effect size  $r > 0.3$  (medium effect) were highlighted in red. We calculated the median difference and its 95% confidence interval. To test for equivalence at a significance level of  $\alpha=0.05$  the assumed range of inconsequential difference have to lie within the 95% confidence interval of the median difference. One row is always tested against its corresponding row depending on comparison. Therefore, two rows would have the same statistics, allowing us to leave on of the rows empty which are indicated with the light grey filling. Rows which are not included in certain cell-specific comparisons are marked with the dark grey filling.
